# Supplementary material for: The Met Office Unified Model Global Atmosphere 4.0 and JULES Global Land 4.0 configurations
Source: Copernicus journal article supplement (doi:10.5194/gmd-7-361-2014), 2014-02-20
Supplement: Supplementary file 1 [file gmd-7-361-2014-supplement.pdf]

Supplementary material to: “*The Met Office Unified Model Global Atmosphere 4.0 and JULES Global Land 4.0 configurations*”, submitted to Geosci. Model Dev.

D. N. Walters et al.

Met Office, FitzRoy Road, Exeter, EX1 3PB, UK

April 19, 2013

## Contents

|          |                                                                   |           |
|----------|-------------------------------------------------------------------|-----------|
| <b>1</b> | <b>Introduction</b>                                               | <b>1</b>  |
| <b>2</b> | <b>GA4.0 settings that vary with global horizontal resolution</b> | <b>2</b>  |
| <b>3</b> | <b>GA4.0 settings that vary with vertical resolution</b>          | <b>2</b>  |
| 3.1      | MetUM settings to change with level set . . . . .                 | 2         |
| 3.2      | Details of vertical level sets . . . . .                          | 3         |
| <b>4</b> | <b>Settings that may vary with system/application</b>             | <b>5</b>  |
| <b>5</b> | <b>Example MetUM namelists for a GA4.0/GL4.0 job</b>              | <b>6</b>  |
| 5.1      | Namelist file: CNTLATM . . . . .                                  | 6         |
| 5.2      | Namelist file: CONTCNTL . . . . .                                 | 25        |
| <b>6</b> | <b>Namelist differences between GA4.0/GL4.0 and GA3.0/GL3.0</b>   | <b>32</b> |

## 1 Introduction

This supplementary material to the main paper is designed to help users of GA4.0 and GL4.0 in configuring their systems to correctly implement the new configurations.

## 2 GA4.0 settings that vary with global horizontal resolution

Table 1 lists model settings (as set by the Unified Model User Interface) that should be changed when changing horizontal resolution. The resolutions includes span from N96 resolution ( $\approx 135$  km in the mid-latitudes) to N512 resolution ( $\approx 25$  km in the mid-latitudes) although GA4.0 could be used at global resolutions as high as N1024 ( $\approx 12.5$  km in the mid-latitudes). We have also run GA4.0 in Limited Area Model (LAM) systems with resolutions up to  $\approx 12$  km, but do not include details of how to do this here.

| Panel name                                                                                                 | N96                                 | N216   | N320   | N512    |
|------------------------------------------------------------------------------------------------------------|-------------------------------------|--------|--------|---------|
| Variable name                                                                                              |                                     |        |        |         |
| Atmos $\rightarrow$ Model resolution and domain                                                            |                                     |        |        |         |
| Number of columns                                                                                          | 192                                 | 432    | 640    | 1024    |
| Number of rows                                                                                             | 145                                 | 325    | 481    | 769     |
| Extended EW halo size (points)                                                                             | 4                                   | 4      | 4      | 5       |
| Extended NS halo size (points)                                                                             | 5                                   | 7      | 7      | 8       |
| Number of land points                                                                                      | Use relevant number from mask file  |        |        |         |
| Atmos $\rightarrow$ Sci params $\rightarrow$ Timestepping                                                  |                                     |        |        |         |
| Number of timesteps per period (timestep)                                                                  | 72                                  | 96     | 120    | 144     |
| $\implies \Delta t$ (mins):                                                                                | 20                                  | 15     | 12     | 10      |
| Atmos $\rightarrow$ Sci params $\rightarrow$ Sec-by-sec $\rightarrow$ Sec10: Solver                        |                                     |        |        |         |
| ADI pseudo-timestep                                                                                        | 0.0008                              | 0.0003 | 0.0002 | 0.00015 |
| Maximum solver iterations                                                                                  | 100                                 | 200    | 200    | 500     |
| Atmos $\rightarrow$ Sci params $\rightarrow$ Sec-by-sec $\rightarrow$ Sec12: Advection                     |                                     |        |        |         |
| SL advection scheme: Theta                                                                                 | 0 3*                                | 0 1    | 0 1    | 0 1     |
| SL advection scheme: Moisture/tracers                                                                      | 1 6*                                | 1 7    | 1 7    | 1 7     |
| SL advection scheme: Winds                                                                                 | 0 3*                                | 0 1    | 0 1    | 0 1     |
| Atmos $\rightarrow$ Sci params $\rightarrow$ Sec-by-sec $\rightarrow$ Sec4: LSP                            |                                     |        |        |         |
| Number of substeps over full column                                                                        | Use equivalent of 1 step per 2 mins |        |        |         |
| Atmos $\rightarrow$ Sci params $\rightarrow$ Sec-by-sec $\rightarrow$ Sec5: Convection                     |                                     |        |        |         |
| Threshold vertical velocity                                                                                | 0.3                                 | 0.4    | 0.4    | 0.4     |
| Atmos $\rightarrow$ Sci params $\rightarrow$ Sec-by-sec $\rightarrow$ Sec13: Diffusion $\rightarrow$ Combi |                                     |        |        |         |
| Max number of filter sweeps                                                                                | 8                                   | 8      | 8      | 16      |
| Atmos $\rightarrow$ Sci params $\rightarrow$ Sec-by-sec $\rightarrow$ Sec13: Diff $\rightarrow$ Targ       |                                     |        |        |         |
| Targeted diffusion test value (m/s)                                                                        | 0.3                                 | 1      | 1.5    | 2.5     |

Table 1: GA4.0 settings that vary with global horizontal resolution. \*N.B. N96 uses a quasi-cubic interpolation in the horizontal, whilst all higher resolutions (including regional models) use cubic.

## 3 GA4.0 settings that vary with vertical resolution

### 3.1 MetUM settings to change with level set

Table 2 lists model settings (as set by the Unified Model User Interface) that should be changed when changing vertical resolutions. Note that as discussed in the main paper, GA4.0 systems should only use either L85(50<sub>t</sub>,35<sub>s</sub>)<sub>85</sub>, L70(50<sub>t</sub>,20<sub>s</sub>)<sub>80</sub>, or L70(50<sub>t</sub>,13<sub>s</sub>)<sub>40</sub> level sets.

| Panel name                                                              | Variable name                                    | L85(50 <sub>t</sub> ,35 <sub>s</sub> ) <sub>85</sub> | L70(50 <sub>t</sub> ,20 <sub>s</sub> ) <sub>80</sub> | L70(50 <sub>t</sub> ,13 <sub>s</sub> ) <sub>40</sub> |
|-------------------------------------------------------------------------|--------------------------------------------------|------------------------------------------------------|------------------------------------------------------|------------------------------------------------------|
| Atmos → Model resolution and domain → Vertical                          |                                                  |                                                      |                                                      |                                                      |
|                                                                         | Number of levels                                 | 85                                                   | 70                                                   | 63                                                   |
|                                                                         | Number of wet levels                             | 85                                                   | 70                                                   | 63                                                   |
|                                                                         | Number of ozone levels                           | 85                                                   | 70                                                   | 63                                                   |
|                                                                         | Number of cloud levels in radiation              | 85                                                   | 70                                                   | 63                                                   |
|                                                                         | User defined level set                           | Point to appropriate level set (see below)           |                                                      |                                                      |
| Atmos → Model Configuration → Atm. Tracers:                             |                                                  |                                                      |                                                      |                                                      |
|                                                                         | Number of tracer levels                          | 85                                                   | 70                                                   | 63                                                   |
| Atmos → Sci params → Level by level                                     |                                                  |                                                      |                                                      |                                                      |
|                                                                         | End level for Div damping coeffs=0.0             | 85                                                   | 70                                                   | 63                                                   |
|                                                                         | End level for Rhcrit=0.8                         | 85                                                   | 70                                                   | 63                                                   |
| Atmos → Sci params → H <sub>2</sub> O prod by CH <sub>4</sub> oxidation |                                                  |                                                      |                                                      |                                                      |
|                                                                         | Model top boundary (m)                           | 85000                                                | 80000                                                | 40000                                                |
| Atmos → Sci params → Sec-by-sec → Sec13: Diffusion                      |                                                  |                                                      |                                                      |                                                      |
|                                                                         | Start level for dry adjustment of theta          | 51                                                   | 50                                                   | 51                                                   |
|                                                                         | End level for dry adjustment of theta            | 85                                                   | 70                                                   | 63                                                   |
|                                                                         | Horizontal level of 1 <sup>st</sup> flat level   | 51                                                   | 50                                                   | 51                                                   |
| Atmos → Sci params → Sec-by-sec → Sec13: Diff → Targ                    |                                                  |                                                      |                                                      |                                                      |
|                                                                         | Targeted diffusion apply end level               | 53                                                   | 52                                                   | 53                                                   |
|                                                                         | Horizontal level to switch off steep slope check | 51                                                   | 50                                                   | 51                                                   |

Table 2: GA4.0 settings that vary with atmospheric vertical resolution

### 3.2 Details of vertical level sets

In the vertical, the MetUM uses the terrain-following height coordinate  $\eta$ , which is normalised to be  $\eta = 0$  at the lower boundary, and  $\eta = 1$  at a height  $z_T$ , the height of the fixed model lid. In between, the height above mean sea level at any given point,  $z$ , is defined by

$$z = \begin{cases} \eta z_T + h \left(1 - \frac{\eta}{\eta_I}\right)^2, & 0 \leq \eta \leq \eta_I; \\ \eta z_T, & \eta_I \leq \eta \leq z_T, \end{cases} \quad (1)$$

where  $h$  is the height of the model orography above the earth's mean radius and  $\eta_I$  is the level at and above which the levels are flat.

The namelists below detail the level sets used with GA4.0. In these namelists, the variable `z_top_of_model`= $z_T$  (in metres), `eta_theta` is the array of  $\eta$  values for the levels on which the prognostic potential temperature ( $\theta$ ) is held including the surface, `eta_rho` is the array of  $\eta$  values for the levels on which the prognostic density ( $\rho$ ) is held, and `first_constant_rho_level` is the  $\rho$ -level at which  $\eta = \eta_I$ .

#### Level set L85(50<sub>t</sub>,35<sub>s</sub>)<sub>85</sub>

```
&VERTLEVS
  z_top_of_model =      85000.00 ,
  first_constant_rho_level=   51 ,
  eta_theta=
  0.0000000E+00,   0.2352941E-03,   0.6274510E-03,   0.1176471E-02,   0.1882353E-02,
  0.2745098E-02,   0.3764706E-02,   0.4941176E-02,   0.6274510E-02,   0.7764705E-02,
  0.9411764E-02,   0.1121569E-01,   0.1317647E-01,   0.1529412E-01,   0.1756863E-01,
  0.2000000E-01,   0.2258823E-01,   0.2533333E-01,   0.2823529E-01,   0.3129411E-01,
  0.3450980E-01,   0.3788235E-01,   0.4141176E-01,   0.4509804E-01,   0.4894118E-01,
```

|                |                |                |                |                |
|----------------|----------------|----------------|----------------|----------------|
| 0.5294117E-01, | 0.5709804E-01, | 0.6141176E-01, | 0.6588235E-01, | 0.7050980E-01, |
| 0.7529411E-01, | 0.8023529E-01, | 0.8533333E-01, | 0.9058823E-01, | 0.9600001E-01, |
| 0.1015687E+00, | 0.1072942E+00, | 0.1131767E+00, | 0.1192161E+00, | 0.1254127E+00, |
| 0.1317666E+00, | 0.1382781E+00, | 0.1449476E+00, | 0.1517757E+00, | 0.1587633E+00, |
| 0.1659115E+00, | 0.1732221E+00, | 0.1806969E+00, | 0.1883390E+00, | 0.1961518E+00, |
| 0.2041400E+00, | 0.2123093E+00, | 0.2206671E+00, | 0.2292222E+00, | 0.2379856E+00, |
| 0.2469709E+00, | 0.2561942E+00, | 0.2656752E+00, | 0.2754372E+00, | 0.2855080E+00, |
| 0.2959203E+00, | 0.3067128E+00, | 0.3179307E+00, | 0.3296266E+00, | 0.3418615E+00, |
| 0.3547061E+00, | 0.3682416E+00, | 0.3825613E+00, | 0.3977717E+00, | 0.4139944E+00, |
| 0.4313675E+00, | 0.4500474E+00, | 0.4702109E+00, | 0.4920571E+00, | 0.5158098E+00, |
| 0.5417201E+00, | 0.5700686E+00, | 0.6011688E+00, | 0.6353697E+00, | 0.6730590E+00, |
| 0.7146671E+00, | 0.7606701E+00, | 0.8115944E+00, | 0.8680208E+00, | 0.9305884E+00, |
| 0.1000000E+01, |                |                |                |                |
| eta_rho=       |                |                |                |                |
| 0.1176471E-03, | 0.4313726E-03, | 0.9019608E-03, | 0.1529412E-02, | 0.2313725E-02, |
| 0.3254902E-02, | 0.4352941E-02, | 0.5607843E-02, | 0.7019607E-02, | 0.8588235E-02, |
| 0.1031373E-01, | 0.1219608E-01, | 0.1423529E-01, | 0.1643137E-01, | 0.1878431E-01, |
| 0.2129412E-01, | 0.2396078E-01, | 0.2678431E-01, | 0.2976470E-01, | 0.3290196E-01, |
| 0.3619608E-01, | 0.3964706E-01, | 0.4325490E-01, | 0.4701960E-01, | 0.5094118E-01, |
| 0.5501961E-01, | 0.5925490E-01, | 0.6364705E-01, | 0.6819607E-01, | 0.7290196E-01, |
| 0.7776470E-01, | 0.8278431E-01, | 0.8796078E-01, | 0.9329412E-01, | 0.9878433E-01, |
| 0.1044314E+00, | 0.1102354E+00, | 0.1161964E+00, | 0.1223144E+00, | 0.1285897E+00, |
| 0.1350224E+00, | 0.1416128E+00, | 0.1483616E+00, | 0.1552695E+00, | 0.1623374E+00, |
| 0.1695668E+00, | 0.1769595E+00, | 0.1845180E+00, | 0.1922454E+00, | 0.2001459E+00, |
| 0.2082247E+00, | 0.2164882E+00, | 0.2249446E+00, | 0.2336039E+00, | 0.2424783E+00, |
| 0.2515826E+00, | 0.2609347E+00, | 0.2705562E+00, | 0.2804726E+00, | 0.2907141E+00, |
| 0.3013166E+00, | 0.3123218E+00, | 0.3237787E+00, | 0.3357441E+00, | 0.3482838E+00, |
| 0.3614739E+00, | 0.3754014E+00, | 0.3901665E+00, | 0.4058831E+00, | 0.4226810E+00, |
| 0.4407075E+00, | 0.4601292E+00, | 0.4811340E+00, | 0.5039334E+00, | 0.5287649E+00, |
| 0.5558944E+00, | 0.5856187E+00, | 0.6182693E+00, | 0.6542144E+00, | 0.6938630E+00, |
| 0.7376686E+00, | 0.7861323E+00, | 0.8398075E+00, | 0.8993046E+00, | 0.9652942E+00, |

/

**Level set L70(50<sub>t</sub>,20<sub>s</sub>)<sub>80</sub>**

&VERTLEVS

```

z_top_of_model = 8000.0,
first_constant_r_rho_level= 50,
eta_theta=
.0000000, .0002500, .0006667, .0012500, .0020000,
.0029167, .0040000, .0052500, .0066667, .0082500,
.0100000, .0119167, .0140000, .0162500, .0186667,
.0212500, .0240000, .0269167, .0300000, .0332500,
.0366667, .0402500, .0440000, .0479167, .0520000,
.0562500, .0606667, .0652500, .0700000, .0749167,
.0800000, .0852500, .0906668, .0962505, .1020017,
.1079213, .1140113, .1202745, .1267154, .1333406,
.1401592, .1471838, .1544313, .1619238, .1696895,
.1777643, .1861929, .1950307, .2043451, .2142178,
.2247466, .2360480, .2482597, .2615432, .2760868,
.2921094, .3098631, .3296378, .3517651, .3766222,
.4046373, .4362943, .4721379, .5127798, .5589045,
.6112759, .6707432, .7382500, .8148403, .9016668,
1.0000000,
eta_rho=
.0001250, .0004583, .0009583, .0016250, .0024583,
.0034583, .0046250, .0059583, .0074583, .0091250,
.0109583, .0129583, .0151250, .0174583, .0199583,
.0226250, .0254583, .0284583, .0316250, .0349583,
.0384583, .0421250, .0459583, .0499583, .0541250,
.0584584, .0629583, .0676250, .0724583, .0774583,
.0826250, .0879584, .0934586, .0991261, .1049615,
.1109663, .1171429, .1234950, .1300280, .1367499,
.1436715, .1508076, .1581776, .1658067, .1737269,

```

```
.1819786, .1906118, .1996879, .2092815, .2194822,
.2303973, .2421538, .2549014, .2688150, .2840981,
.3009862, .3197505, .3407014, .3641936, .3906297,
.4204658, .4542161, .4924589, .5358422, .5850902,
.6410096, .7044966, .7765451, .8582535, .9508334,
```

/

#### Level set L63(50<sub>t</sub>,13<sub>s</sub>)<sub>40</sub>

```
&VERTLEVS
```

```
z_top_of_model = 41022.39,
first_constant_r_rho_level= 50,
eta_theta=
```

```
0.0000000E+00, 4.8753872E-04, 1.3001683E-03, 2.4376935E-03, 3.9003098E-03,
5.6880168E-03, 7.8006196E-03, 1.0238313E-02, 1.3001097E-02, 1.6088778E-02,
1.9501548E-02, 2.3239411E-02, 2.7302168E-02, 3.1690016E-02, 3.6402956E-02,
4.1440792E-02, 4.6803717E-02, 5.2491732E-02, 5.8504645E-02, 6.4842649E-02,
7.1505740E-02, 7.8493737E-02, 8.5806817E-02, 9.3444988E-02, 1.0140806E-01,
1.0969621E-01, 1.1830946E-01, 1.2724760E-01, 1.3651083E-01, 1.4609917E-01,
1.5601239E-01, 1.6625071E-01, 1.7681430E-01, 1.8770337E-01, 1.9891910E-01,
2.1046326E-01, 2.2233970E-01, 2.3455390E-01, 2.4711467E-01, 2.6003483E-01,
2.7333215E-01, 2.8703120E-01, 3.0116495E-01, 3.1577647E-01, 3.3092082E-01,
3.4666792E-01, 3.6310497E-01, 3.8034007E-01, 3.9850461E-01, 4.1775790E-01,
4.3829069E-01, 4.6033016E-01, 4.8414484E-01, 5.1004976E-01, 5.3841203E-01,
5.6965858E-01, 6.0428101E-01, 6.4284474E-01, 6.8599641E-01, 7.3447162E-01,
7.8910542E-01, 8.5084140E-01, 9.2074203E-01, 1.0000000E+00,
```

```
eta_rho=
```

```
2.4376936E-04, 8.9375599E-04, 1.8688334E-03, 3.1690018E-03, 4.7940658E-03,
6.7442209E-03, 9.0194661E-03, 1.1619608E-02, 1.4544840E-02, 1.7795164E-02,
2.1370383E-02, 2.5270693E-02, 2.9496092E-02, 3.4046389E-02, 3.8921777E-02,
4.4122253E-02, 4.9647629E-02, 5.5498090E-02, 6.1673649E-02, 6.8174094E-02,
7.4999638E-02, 8.2150280E-02, 8.9625798E-02, 9.7426422E-02, 1.0555213E-01,
1.1400293E-01, 1.2277844E-01, 1.3187923E-01, 1.4130490E-01, 1.5105568E-01,
1.6113155E-01, 1.7153251E-01, 1.8225874E-01, 1.9331124E-01, 2.0469119E-01,
2.1640146E-01, 2.2844680E-01, 2.4083437E-01, 2.5357473E-01, 2.6668346E-01,
2.8018168E-01, 2.9409820E-01, 3.0847082E-01, 3.2334876E-01, 3.3879438E-01,
3.5488644E-01, 3.7172252E-01, 3.8942233E-01, 4.0813133E-01, 4.2802429E-01,
4.4931039E-01, 4.7223738E-01, 4.9709725E-01, 5.2423090E-01, 5.5403531E-01,
5.8696973E-01, 6.2356299E-01, 6.6442049E-01, 7.1023387E-01, 7.6178843E-01,
8.1997347E-01, 8.8579178E-01, 9.6037108E-01,
```

/

## 4 Settings that may vary with system/application

As described in the main paper, GA4.0/GL4.0 defines the scientific configuration of the MetUM/JULES components used in various systems. In addition to the differences with horizontal and vertical resolution described above, there are some settings that may be seen as system dependent, which we illustrate in this section. In Table 3 we illustrate the systems settings that vary between deterministic global NWP and climate research configurations of GA4.0/GL4.0. A good example of such a difference is the use of conservative advection for moist variables and tracers. For the advection scheme to exactly conserve these variables requires use of the computationally more expensive Priestly algorithm. This is necessary for long free-running integrations, such as those used for climate projections. For short forecast runs, however, this is not necessary; because the process of data assimilation (DA) of atmospheric moisture and tracers will not precisely conserve the mass of these tracers, it is not necessary to leave this on for the integrity of the continuous assimilation cycle.

| Panel name                                            | NWP                       | Climate               |
|-------------------------------------------------------|---------------------------|-----------------------|
| Variable name                                         |                           |                       |
| Input/Output Control → General Configuration          |                           |                       |
| Use 360 day calendar                                  | Off                       | On*                   |
| Ind sec opts → Misc sec 94-98                         |                           |                       |
| Summation type                                        | Fast, non-reprod.         | Double-double reprod. |
| Atmos → Sci params → Sec-by-sec → Sec3: BL → Land     |                           |                       |
| Use coastal tiling                                    | Off                       | On                    |
| Atmos → Sci params → Sec-by-sec → Sec11: Tracer adv   |                           |                       |
| Advect tracers with cons. scheme                      | On unless using tracer DA | On                    |
| Atmos → Sci params → Sec-by-sec → Sec12: Advection    |                           |                       |
| Moisture conservation                                 | Off                       | More accurate         |
| Atmos → Sci params → Sec-by-sec → Sec13: Diff         |                           |                       |
| HadGEM2 polar filter                                  | Off                       | On                    |
| Atmos → Sci params → Sec-by-sec → Sec13: Diff → Combi |                           |                       |
| Diffusion of horizontal winds                         | On                        | On                    |
| Diffusion of theta                                    | On                        | Off                   |
| Polar filter start latitude                           | 87                        | 85                    |
| Atmos → Sci params → Sec-by-sec → Sec14: Energy corr. |                           |                       |
| Energy correction                                     | Off                       | Dry mass              |
| Atmos → Sci params → Sec-by-sec → Sec17: Aerosol      |                           |                       |
| As required by system**                               |                           |                       |

Table 3: Example of GA4.0 settings that may vary with system/application. \*N.B. 360 day calendar not compulsory for GA4.0 climate jobs, but still used as standard. \*\* As discussed in the main paper, the aerosol definition is dependent on the system. Most climate runs use full CLASSIC aerosol with offline oxidants. Runs on Seasonal timescales or shorter use CLASSIC aerosol climtologies, but at GA4.0 these only interact with the physics via the direct radiative effect. Finally, we are starting to introduce dust forecasting on NWP timescales, but this does not yet usually interact with the rest of the model evolution.

## 5 Example MetUM namelists for a GA4.0/GL4.0 job

Here, we include a set of MetUM/JULES Fortran namelists for a GA4.0/GL4.0 job at code base vn8.1. The job in question is an N96 resolution ( $\approx 135$  km in the mid-latitudes) L85(50<sub>t</sub>,35<sub>s</sub>)<sub>85</sub> level set Atmosphere/Land-only climate simulation labelled N96-AL\_clim in Sec. 4 of the main paper.

### 5.1 Namelist file: CNTLATM

```
&NLSTCATM
MODELDOMAIN=1 ,
LSNOW_ALBEDO=.FALSE. ,
LSSICE_ALBEDO=.FALSE. ,
LSICE_MELTPONDS=.FALSE. ,
LSICE_SCATTERING=.FALSE. ,
LSICE_HADGEM1A=.FALSE. ,
A_SW_RADSTEP_DIAG=3,
A_SW_RADSTEP_PROG=9,
A_LW_RADSTEP_DIAG=3,
A_LW_RADSTEP_PROG=9,
L_RAD_DEG=.FALSE. ,
L_RAD_SZACOR=.TRUE. ,
```

```

L_RAD_PERTURB=.TRUE. ,
L_MOD_BARKER_ALBEDO=.TRUE. ,
L_USE_SPEC_SEA=.TRUE. ,
L_SICE_HEATFLUX=.TRUE. ,
L_MURK=.FALSE. ,
L_MURK_SOURCE=.FALSE. ,
L_MURK_ADVECT=.FALSE. ,
L_MURK_BDRY=.FALSE. ,
L_MURK_RAD=.FALSE. ,
L_BL_TRACER_MIX=.FALSE. ,
L_MICROPHY=.TRUE. ,
L_SULPC_SO2=.TRUE. ,
L_SO2=.TRUE. ,
L_SO4_AITKEN=.TRUE. ,
L_SO4_ACCU=.TRUE. ,
L_SO4 DISS=.TRUE. ,
L_DMS=.TRUE. ,
L_NH3=.TRUE. ,
L_SOOT=.TRUE. ,
L_SOOT_NEW=.TRUE. ,
L_SOOT_AGD=.TRUE. ,
L_SOOT_CLD=.TRUE. ,
CALL_CHEMFREQ=1,
L_SO2_SURFEM=.TRUE. ,
L_SO2_HILEM=.TRUE. ,
L_SO2_NATEM=.TRUE. ,
L_SULPC_DMS=.TRUE. ,
L_DMS_EM=.TRUE. ,
L_DMS_EM_INTER=.TRUE. ,
L_DMS_OINTER=.FALSE. ,
L_DMS_Liss_Merlivat=.FALSE. ,
L_DMS_Wanninkhof=.TRUE. ,
L_DMS_Nightingale=.FALSE. ,
L_SULPC_OZONE=.TRUE. ,
L_SULPC_ONLINE_OXIDANTS=.FALSE. ,
L_SULPC_2_WAY_COUPLING=.FALSE. ,
L_SULPC_NH3=.TRUE. ,
L_USE_SULPC_DIRECT=.TRUE. ,
L_NH3_EM=.FALSE. ,
L_SULPC_SO2_O3_NONBUFFERED=.TRUE. ,
L_USE_SULPC_INDIRECT_SW=.TRUE. ,
L_USE_SULPC_INDIRECT_LW=.TRUE. ,
L_USE_SULPHATE_AUTOCONV=.TRUE. ,
L_USE_SULPHATE_SULPC=.TRUE. ,
L_NITRATE=.FALSE. ,
L_NITR_ACC=.FALSE. ,
L_NITR_DISS=.FALSE. ,
L_USE_NITRATE_DIRECT=.FALSE. ,
L_USE_NITRATE_INDIRECT=.FALSE. ,
L_USE_NITRATE_AUTOCONV=.FALSE. ,
L_USE_NITRATE_SULPC=.FALSE. ,
L_USE_SEASALT_INDIRECT=.TRUE. ,
L_USE_SEASALT_AUTOCONV=.TRUE. ,
L_USE_SEASALT_SULPC=.TRUE. ,
L_USE_SEASALT_DIRECT=.TRUE. ,
L_USE_SEASALT_PM=.FALSE. ,
L_SOOT_SUREM=.FALSE. ,
L_SOOT_HILEM=.TRUE. ,
L_USE_SOOT_DIRECT=.TRUE. ,
L_USE_SOOT_INDIRECT=.FALSE. ,
L_USE_SOOT_AUTOCONV=.FALSE. ,
L_USE_SOOT_SULPC=.FALSE. ,
L_BIOMASS=.TRUE. ,

```

```

L_BMASS_SUREM=.TRUE. ,
L_BMASS_HILEM=.TRUE. ,
L_USE_BMASS_DIRECT=.TRUE. ,
L_USE_BMASS_INDIRECT=.TRUE. ,
L_USE_BMASS_AUTOCONV=.TRUE. ,
L_USE_BMASS_SULPC=.TRUE. ,
L_BMASS_NEW=.TRUE. ,
L_BMASS_AGD=.TRUE. ,
L_BMASS_CLD=.TRUE. ,
L_USE_BIOGENIC=.TRUE. ,
L_USE_ARCLBIOM=.FALSE. ,
L_USE_ARCLBLCK=.FALSE. ,
L_USE_ARCLSSLT=.FALSE. ,
L_USE_ARCLSULP=.FALSE. ,
L_USE_ARCLDUST=.FALSE. ,
L_USE_ARCLOCFF=.FALSE. ,
L_USE_ARCLDLTA=.FALSE. ,
L_OCOFF=.TRUE. ,
L_OCOFF_SUREM=.FALSE. ,
L_OCOFF_HILEM=.TRUE. ,
L_USE_OCOFF_DIRECT=.TRUE. ,
L_USE_OCOFF_INDIRECT=.TRUE. ,
L_USE_OCOFF_AUTOCONV=.TRUE. ,
L_USE_OCOFF_SULPC=.TRUE. ,
L_OCOFF_NEW=.TRUE. ,
L_OCOFF_AGD=.TRUE. ,
L_OCOFF_CLD=.TRUE. ,
L_DUST=.TRUE. ,
L_dust_diag=.FALSE. ,
L_USE_DUST=.TRUE. ,
L_DUST_DIV1=.TRUE. ,
L_DUST_DIV2=.TRUE. ,
L_DUST_DIV3=.TRUE. ,
L_DUST_DIV4=.TRUE. ,
L_DUST_DIV5=.TRUE. ,
L_DUST_DIV6=.TRUE. ,
L_CAM_DUST=.FALSE. ,
L_TWOBIN_DUST_CNTRLATM=.FALSE. ,
L_DUST_DIV1_LBC_OUT=.FALSE. ,
L_DUST_DIV2_LBC_OUT=.FALSE. ,
L_DUST_DIV3_LBC_OUT=.FALSE. ,
L_DUST_DIV4_LBC_OUT=.FALSE. ,
L_DUST_DIV5_LBC_OUT=.FALSE. ,
L_DUST_DIV6_LBC_OUT=.FALSE. ,
L_SO2_LBC_OUT=.FALSE. ,
L_SO4_AITKEN_LBC_OUT=.FALSE. ,
L_SO4_ACCU_LBC_OUT=.FALSE. ,
L_SO4 DISS_LBC_OUT=.FALSE. ,
L_DMSS_LBC_OUT=.FALSE. ,
L_NH3_LBC_OUT=.FALSE. ,
L_SOOT_NEW_LBC_OUT=.FALSE. ,
L_SOOT_AGD_LBC_OUT=.FALSE. ,
L_SOOT_CLD_LBC_OUT=.FALSE. ,
L_BMASS_NEW_LBC_OUT=.FALSE. ,
L_BMASS_AGD_LBC_OUT=.FALSE. ,
L_BMASS_CLD_LBC_OUT=.FALSE. ,
L_OCOFF_NEW_LBC_OUT=.FALSE. ,
L_OCOFF_AGD_LBC_OUT=.FALSE. ,
L_OCOFF_CLD_LBC_OUT=.FALSE. ,
L_NITR_ACC_LBC_OUT=.FALSE. ,
L_NITR DISS_LBC_OUT=.FALSE. ,
L_DUST_DIV1_LBC=.FALSE. ,
L_DUST_DIV2_LBC=.FALSE. ,

```



```

L_DUST_DIV3_LBC=.FALSE. ,
L_DUST_DIV4_LBC=.FALSE. ,
L_DUST_DIV5_LBC=.FALSE. ,
L_DUST_DIV6_LBC=.FALSE. ,
L_SO2_LBC=.FALSE. ,
L_SO4_AITKEN_LBC=.FALSE. ,
L_SO4_ACCU_LBC=.FALSE. ,
L_SO4 DISS_LBC=.FALSE. ,
L_DMS_LBC=.FALSE. ,
L_NH3_LBC=.FALSE. ,
L_SOOT_NEW_LBC=.FALSE. ,
L_SOOT_AGD_LBC=.FALSE. ,
L_SOOT_CLD_LBC=.FALSE. ,
L_BMASS_NEW_LBC=.FALSE. ,
L_BMASS_AGD_LBC=.FALSE. ,
L_BMASS_CLD_LBC=.FALSE. ,
L_OCOFF_NEW_LBC=.FALSE. ,
L_OCOFF_AGD_LBC=.FALSE. ,
L_OCOFF_CLD_LBC=.FALSE. ,
L_NITR_ACC_LBC=.FALSE. ,
L_NITR_DISS_LBC=.FALSE. ,
HSWBANDS= 6,
HLWBANDS= 9,
L_CLD_AREA=.FALSE. ,
L_ACF_CUSACK=.FALSE. ,
L_ACF_BROOKS=.FALSE. ,
L_PC2=.TRUE. ,
L_PC2_RESET=.FALSE. ,
l_pc2_diag_sh=.FALSE. ,
NPMSL_HEIGHT=500.00 ,
L_PMSL_SOR=.FALSE. ,
LEMCORR=.TRUE. ,
LMASS_CORR=.TRUE. ,
LQT_CORR=.FALSE. ,
LEMQ_PRINT=.TRUE. ,
A_ENERGYSTEPS=72,
L_RHCPT=.FALSE. ,
L_AUTO_DEBIAS=.FALSE. ,
L_3D_CCA=.TRUE. ,
L_PHASE_LIM=.TRUE. ,
L_CO2_INTERACTIVE=.FALSE. ,
L_CO2_EMITS=.FALSE. ,
L_Q10=.TRUE. ,
L_NEG_TSTAR=.FALSE. ,
L_VEG_FRACS=.TRUE. ,
L_TRIFFID=.FALSE. ,
L_PHENOL=.FALSE. ,
L_TRIF_EQ=.FALSE. ,
L_NRUN_MID_TRIF=.FALSE. ,
L_DISTURB=.FALSE. ,
CAN_MODEL=4,
PHENOL_PERIOD=0,
TRIFFID_PERIOD=0,
L_UM_JULES_IO=.TRUE. ,
L_FLAKE_MODEL_IO=.FALSE. ,
L_URBAN2T_IO=.FALSE. ,
L_CTILE=.TRUE. ,
A_ASSIM_MODE='AC' ,
problem_number=0,
L_USE_METHOX=.TRUE. ,
Z_TOP=85000.00 ,
L_GWD=.TRUE. ,
L_USE_USSP=.TRUE. ,

```

```

L_RIVERS=.TRUE. ,
L_INLAND=.TRUE. ,
RIVER_STEP=10800,
L_MCR_QCF2=.FALSE. ,
L_MCR_QRAIN=.TRUE. ,
L_MCR_QGRAUP=.FALSE. ,
L_MCR_QCF2_LBC=.FALSE. ,
L_MCR_QRAIN_LBC=.FALSE. ,
L_MCR_QGRAUP_LBC=.FALSE. ,
L_PC2_LBC=.FALSE. ,
L_MURK_LBC=.FALSE. ,
L_int_uvw_lbc=.FALSE. ,
L_TOP=.TRUE. ,
L_PDM=.FALSE. ,
L_USE_TPPS_OZONE= .FALSE. ,
L_OZONE_INT= 2,
L_RADIATION=.TRUE. ,
L_RAIN=.TRUE. ,
L_MR_PHYSICS1=.TRUE. ,
L_BL=.TRUE. ,
L_HYDROLOGY=.TRUE. ,
L_SOIL_SAT_DOWN=.TRUE. ,
L_anthrop_heat_src=.FALSE. ,
L_ICOUNT=.FALSE. ,
L_UKCA=.FALSE. ,
L_UKCA_RADAER=.FALSE. ,
L_NUDGING=.FALSE. ,
L_FORCING= .FALSE. ,
L_TIMESTEP= .TRUE. ,
L_RADIANCE=.FALSE. ,
L_INHOM_CLOUD=.FALSE. ,
L_USE_OROG_CORR= .FALSE. ,
L_USE_GRAD_CORR= .TRUE. ,
L_use_skyview= .FALSE. ,
L_orog_unfilt= .FALSE. ,
L_USE_AOD= .TRUE. ,
L_MOD_K_FLUX=.TRUE. ,
L_CCRad= .TRUE. ,
L_USE_CARIOLLE=.FALSE. ,
L_USE_OZONEINRAD=.FALSE. ,
L_STPHSEED_WRITE=.FALSE. ,
L_STPHSEED_READ=.FALSE. ,
L_OASIS=.FALSE. ,
L_COUPLE_MASTER=.FALSE. ,
L_CONV_HIST=.FALSE. ,
L_DeCplTScr_Prg=.TRUE. ,
L_CldBaseDD_prg=.TRUE. ,
L_conv_opt=3,
L_tke_closure = .FALSE. ,
/

&IAU_nl
L_IAU=.FALSE. ,
/

&TDF_nl
L_TDF=.FALSE. ,
/

&RUN_BL
FORMDRAG=1,
L_use_bl_diag_term=.FALSE. ,

```

```

ALPHA_CD= 2.000e+00,1.500e+00,1.500e+00,1.500e+00,
1.500e+00,1.500e+00,1.500e+00,1.500e+00,1.500e+00,1.500e+00,1.500e+00,1.500e+00,1.500e+00,
1.500e+00,1.500e+00,1.500e+00,1.500e+00,1.500e+00,1.500e+00,1.500e+00,1.500e+00,1.500e+00,
1.500e+00,1.500e+00,1.500e+00,1.500e+00,1.500e+00,1.500e+00,1.500e+00,1.500e+00,1.500e+00,
1.500e+00,1.500e+00,1.500e+00,1.500e+00,1.500e+00,1.500e+00,1.500e+00,1.500e+00,1.500e+00,
1.500e+00,1.500e+00,1.500e+00,1.500e+00,1.500e+00,1.500e+00,1.500e+00,1.500e+00,1.500e+00,
1.500e+00,1.500e+00,1.500e+00,1.500e+00,1.500e+00,1.500e+00,1.500e+00,1.500e+00,1.500e+00,
L_SBLEq=.FALSE. ,
SBL_OP=6,
ISHEAR_BL = 1,
NG_STRESS=2,
par_mezcla_max= 0.500 ,
par_mezcla= 0.150 ,
par_mezcla_min= 0.005 ,
G0_max=20.000 ,
G0_RP=10.000 ,
G0_min= 5.000 ,
Charnock_max= 0.026 ,
Charnock=0.0180 ,
Charnock_min= 0.010 ,
LAMBDA_MIN_MAX=100.000 ,
LAMBDA_MIN_RP=40.000 ,
LAMBDA_MIN_MIN=20.000 ,
RICRIT_MAX= 1.000 ,
RICRIT_RP= 1.000 ,
RICRIT_MIN= 0.250 ,
A_ENT_1_MAX= 0.400 ,
A_ENT_1_RP= 0.230 ,
A_ENT_1_MIN= 0.100 ,
G1_MAX= 1.500 ,
G1_RP= 0.850 ,
G1_MIN= 0.500 ,
SeaSalinityFactor= 0.98 ,
ISeaZ0T= 1 ,
IDynDiag= 4 ,
zhloc_depth_fac=0.30 ,
subs_couple_fix=1,
COR_UST= 2 ,
TRWEIGHTS1= 1 ,
LLAMBDAM2= .FALSE. ,
LFULL_LAMBDA= .FALSE. ,
LEMIS_LAND_GEN=.TRUE. ,
EMIS_LAND_GEN=0.9700 ,
FLUX_GRAD= 0 ,
Entr_enhance_by_Cu= 1 ,
relax_sc_over_cu=0,
Dec_Thres_Cloud=0.10 ,
L_us_blsol=.TRUE. ,
Pstb = 2.000 ,
Puns = 0.500 ,
NON_LOCAL_BL=1,
LOCAL_FA=1,
BUDDY_SEA=1,
OROG_DRAG_PARAM= 0.15 ,
FD_stab_dep=0,
Keep_Ri_FA=1,
NL_BL_LEVELS=30,
COR_MO_ITER=3,
Variable_RiC=1,
cbl_op=2,
sg_orog_mixing=0,
ISrfExCnvGust=1,

```

```
Fric_heating=1,  
Prandtl=1,  
/  

```

```
&RUN_BLICE  
ZOHSEA= 4.00000e-05,  
ZOMIZ= 5.00000e-04,  
ZOSICE= 5.00000e-04,  
/  

```

```
&RUN_BLVEG  
ALBSNCNVG = 4.00000e-01, 8.00000e-01, 8.00000e-01, 8.00000e-01,  
ALBSNFNVG = 1.80000e-01, 6.00000e-02, -1.00000e+00, 7.50000e-01,  
CATCHNVG = 5.00000e-01, 0.00000e+00, 0.00000e+00, 0.00000e+00,  
GSNVG = 0.00000e+00, 0.00000e+00, 1.00000e-02, 1.00000e+06,  
INFIL_NVG = 1.00000e-01, 0.00000e+00, 5.00000e-01, 0.00000e+00,  
ROOTDNVG = 5.00000e-01, 1.00000e+00, 1.00000e-01, 0.00000e+00,  
Z0_NVG = 1.00000e+00, 1.00000e-04, 1.00000e-03, 5.00000e-04,  
CH_NVG = 2.80000e+05, 2.11000e+07, 0.00000e+00, 0.00000e+00,  
VF_NVG = 1.00000e+00, 1.00000e+00, 0.00000e+00, 0.00000e+00,  
CANRADMOD=4,  
ILAYERS=10,  
/  

```

```
&RUN_PFT  
ALBSNC_MAX = 2.50000e-01, 2.50000e-01, 6.00000e-01, 6.00000e-01, 4.00000e-01,  
ALBSNC_MIN = 3.00000e-01, 3.00000e-01, 8.00000e-01, 8.00000e-01, 8.00000e-01,  
ALBSNF_MAX = 1.43000e-01, 8.80000e-02, 1.92000e-01, 1.59000e-01, 1.15000e-01,  
DZ0V_DH = 5.00000e-02, 5.00000e-02, 1.00000e-01, 1.00000e-01, 1.00000e-01,  
CATCH0 = 5.00000e-01, 5.00000e-01, 5.00000e-01, 5.00000e-01, 5.00000e-01,  
DCATCHDLAI = 5.00000e-02, 5.00000e-02, 5.00000e-02, 5.00000e-02, 5.00000e-02,  
INFIL_F = 4.00000e+00, 4.00000e+00, 2.00000e+00, 2.00000e+00, 2.00000e+00,  
KEXT = 5.00000e-01, 5.00000e-01, 5.00000e-01, 5.00000e-01, 5.00000e-01,  
ROOTDFT = 3.00000e+00, 1.00000e+00, 5.00000e-01, 5.00000e-01, 5.00000e-01,  
/  

```

```
&RUN_LAND  
FRAC_SNOW_SUBL_MELT=1,  
WARMSNOW_MELT_FIX=.TRUE. ,  
MASKD= 0.20 ,  
L_VG_SOIL=.TRUE. ,  
SOILHC_METHOD=2,  
ALL_TILES=0,  
IScrnTdiag=2,  
i_modiscopt=0,  
/  

```

```
&RUN_Precip  
RHCRT= 0.920 ,0.918 ,0.916 ,0.912 ,0.908 ,0.903 ,0.898 ,0.891 ,  
0.885 ,0.877 ,0.869 ,0.859 ,0.850 ,0.839 ,0.828 ,0.815 ,0.803 ,0.800 ,0.800 ,0.800 ,0.800 ,  
0.800 ,0.800 ,0.800 ,0.800 ,0.800 ,0.800 ,0.800 ,0.800 ,0.800 ,0.800 ,0.800 ,0.800 ,0.800 ,  
0.800 ,0.800 ,0.800 ,0.800 ,0.800 ,0.800 ,0.800 ,0.800 ,0.800 ,0.800 ,0.800 ,0.800 ,0.800 ,  
0.800 ,0.800 ,0.800 ,0.800 ,0.800 ,0.800 ,0.800 ,0.800 ,0.800 ,0.800 ,0.800 ,0.800 ,0.800 ,  
0.800 ,0.800 ,0.800 ,0.800 ,0.800 ,0.800 ,0.800 ,0.800 ,0.800 ,0.800 ,0.800 ,0.800 ,  
L_IT_MELTING=.FALSE. ,  
L_AUTOC_3B=.FALSE. ,  
L_AUTOLIM_3B=.FALSE. ,  
LAUTOCONVMURK=.FALSE. ,  
EC_AUTO= 0.5500 ,  
X1R=2.2000e-01 ,
```

```

X2R= 2.2000 ,
X4R= 0.0000 ,
ntot_land=3.0000e+08,
ntot_sea=1.0000e+08,
X1I=2.0E6,
X1IC=40.0E6,
l_psd=.FALSE. ,
l_psd_global=.FALSE. ,
l_hallett_mossop=.FALSE. ,
AI=1.8500e-02,
BI=1.9000e+00,
AIC=1.8500e-02,
BIC=1.9000e+00,
as_rrmax=1.0,
l_mcr_iter=.TRUE. ,
lsiter=1,
NITER_BS=10,
LSP_EI=2.072000e-01,
LSP_FI=6.3800e-01,
LSP_EIC=6.049000e-02,
LSP_FIC=8.3100e-01,
L_CRY_AGG_DEP=.FALSE. ,
l_rainfall_as=.TRUE. ,
l_mcr_asmax=.FALSE. ,
RHCRIT_max= 0.910 ,
RHCRIT_min= 0.875 ,
M_CI_max= 1.400 ,
M_CI= 1.000 ,
M_CI_min= 0.600 ,
l_droplet_settle=.TRUE. ,
l_droplet_tpr=.FALSE. ,
z_peak_nd=500.0,
ndrop_surf=20.0E6,
l_taper_new=.FALSE. ,
max_drop_surf=10.0E7,
/

&RUN_Cloud
L_EACF=.FALSE. ,
CLOUDFRACTIONMETHOD=2,
OVERLAP_ICE_LIQUID= -1.0000,
ICE_FRACTIONMETHOD=1,
CTT_WEIGHT=0.333,
T_WEIGHT=0.333,
QSAT_FIXED=0.1E-3,
SUB_CLD=0.225,
dbsdtbs_turb_0=1.50e-04,
l_micro_eros=.FALSE. ,
i_pc2_erosion_method=3,
i_pc2_conv_coupling=3,
l_ensure_min_in_cloud_qcf=.TRUE. ,
l_fixbug_pc2_bl_cff=.FALSE. ,
l_fixbug_pc2_qcl_incr=.TRUE. ,
i_fixbug_pc2_checks=2,
pc2_falliceshear_method=2,
cff_spread_rate= 1.00e-03,
starticeTKelvin=273.15,
alliceTdegC=-20.00,
/

&RUN_Convection
LMOM=.TRUE. ,
l_re diagnosis=.FALSE. ,

```

```

L_CONV4A=.TRUE. ,
L_CAPE=.TRUE. ,
L_SDXS=.FALSE. ,
L_XSCOMP=.TRUE. ,
deep_cmt_opt=5,
mid_cmt_opt=0,
DD_opt=1,
icvdiag=1,
tv1_sd_opt=2,
plume_water_load=0,
dil_plume_water_load=0,
cvdiag_sh_wtest=0.020 ,
cvdiag_inv=0,
mid_cnv_pmin=10000.00 ,
bl_cnv_mix=1,
l4a_kterm=.FALSE. ,
CCW_FOR_PRECIP_OPT=4,
qlmin=3.0000e-04,
fac_qsar=0.500 ,
L_CLOUD_DEEP=.TRUE. ,
A_CONVECT_SEGMENTS=-99,
A_CONVECT_SEG_SIZE=80,
MPARWIR=1.5000e-03,
L_anvil=.TRUE. ,
ANVILFACTOR=1.0000 ,
TOWERFACTOR=1.0000 ,
UDFACTOR=1.0000 ,
N_CONV_CALLS=2,
CAPE_TIMESCALE=3600,
CAPE_OPT=3,
ADAPT=7,
R_DET=0.9000 ,
amdetsfac= 3.00 ,
ENT_FAC=1.0 ,
CAPE_MIN=0.5 ,
W_CAPE_LIMIT= 0.3 ,
CAPE_BOTTOM=5,
CAPE_TOP=50,
CONVECTION_OPTION=3,
TICE=263.1500 ,
QSTICE=3.5000e-03,
L_EMAN_DD=.FALSE. ,
L_fix_udfactor=.FALSE. ,
Rad_cloud_decay_opt=2,
Sh_pert_Opt=1,
termconv=1,
fixed_cld_life= 7200.00 ,
cca_min= 2.000e-02,
anv_opt= 0,
limit_pert_opt=2,
cnv_wat_load_opt=0,
cca2d_sh_opt= 1,
cca2d_dp_opt= 1,
cca2d_md_opt= 1,
cca_sh_knob= 0.00 ,
cca_dp_knob= 0.00 ,
cca_md_knob= 0.00 ,
ccw_sh_knob= 0.00 ,
ccw_dp_knob= 0.00 ,
ccw_md_knob= 0.00 ,
cld_life_opt= 0,
ICONV_SHALLOW=1,
ICONV_CONGESTUS=0,

```

```

ICONV_DEEP=1,
ICONV_MID=1,
ent_opt_dp=3,
ent_dp_power=2.00,
ent_fac_dp=1.35,
ent_opt_md=0,
ent_fac_md=0.90,
/

```

```

&RUN_Stochastic
L_SKEB2=.FALSE. ,
L_SKEB2_PSIDISP=.FALSE. ,
L_SKEB2_SKEB1DISP=.FALSE. ,
L_SKEB2_PSICDISP=.FALSE. ,
L_SKEB2_CDISP_CAPE=.TRUE. ,
L_SKEB2_CDISP_MFLX=.FALSE. ,
alphac=2.00e-03,
N1=20,
N2=144,
tot_backscat=1.00e-04,
bR= 0.0275,
skeb2_botlev=2,
skeb2_toplev=37,
tau=2.00e+04,
L_SKEB2_VELPOT=.FALSE. ,
L_RP2=.FALSE. ,
/

```

```

&RUN_Radiation
L_CLIMAT_AEROSOL=.TRUE. ,
L_HadGEM1_Clim_Aero=.TRUE. ,
L_RAD_USE_CLIM_VOLC=.FALSE. ,
ALPHAC= 0.80 , ALPHAM= 0.60 , DTICE= 10.00 ,
A_SW_SEGMENTS=-99,
A_SW_SEG_SIZE=80,
A_LW_SEGMENTS=-99,
A_LW_SEG_SIZE=80,
L_EQT=.TRUE. ,
L_SEC_VAR=.FALSE. ,
L_CLIM_AERO_HGT=.FALSE. ,
AERO_BL_LEVELS=50,
CO2MMR= 5.24100e-04 ,
O2MMR= 0.2314,
N2OMMR= 4.665e-07,
CH4MMR= 9.139e-07,
C11MMR= 1.053e-09,
C12MMR= 1.595e-09,
IS_NCOL=300,
DP_CORR_STRAT=10000.000,
RAD_MCICA_SIGMA= 0.750,
RAD_MCICA_SAMPLING= 2,
/

```

```

&RUN_GWD
KAY_GWAVE= 3.30e+03,
GWD_FRC= 4.00,
GWD_FRC_max= 4.000,
GWD_FRC_min= 2.000,
KAY_GWAVE_max=133000.000,
KAY_GWAVE_min= 75000.000,
SAT_SCHEME=0,

```

```
GWDFSAT=1.0,  
L_FIX_GWSATN= .TRUE. ,  
L_GWD_40KM=.TRUE. ,  
L_USSP_OPAQUE=.TRUE. ,  
USSP_LAUNCHFACTOR=1.5000 ,  
/  

```

```
&RUN_Dust  
us_am= 1.45 ,  
sm_corr= 0.50 ,  
horiz_d= 2.50 ,  
l_fix_size_dist= .FALSE. ,  
dust_veg_emiss= 1 ,  
/  

```

```
&RUN_Aerosol  
SO2_HIGH_LEVEL=8,  
SOOT_HIGH_LEVEL=3,  
BMASS_HIGH_LEVEL_1=3,  
BMASS_HIGH_LEVEL_2=20,  
OCFF_HIGH_LEVEL=3,  
L_TRACER1_NON_HYDRO= .TRUE. ,  
/  

```

```
&RUN_UKCA  
LUKCA_FAMILY=.FALSE. ,  
LUKCA_USEOXID=.FALSE. ,  
LUKCA_ADVH2O= .FALSE. ,  
LUKCA_PHOT2D= .FALSE. ,  
LUKCA_FASTJ= .FALSE. ,  
LUKCA_CHEM= .FALSE. ,  
LUKCA_STRAT= .FALSE. ,  
LUKCA_WACHEM= .FALSE. ,  
LUKCA_TROP= .FALSE. ,  
LUKCA_RAQ=.FALSE. ,  
LUKCA_TROPISOP= .FALSE. ,  
LUKCA_STRATTROP= .FALSE. ,  
LUKCA_STRATCFC= .FALSE. ,  
LUKCA_AERCHEM= .FALSE. ,  
LUKCA_USER= .FALSE. ,  
LUKCA_MODE= .FALSE. ,  
LUKCA_DUST=.FALSE. ,  
LUKCA_RNPB= .FALSE. ,  
LUKCA_O3BUDGET= .FALSE. ,  
LUKCA_QCH4INTER= .FALSE. ,  
LUKCA_ISOPINTER= .FALSE. ,  
LUKCA_TERPINTER= .FALSE. ,  
LUKCA_PRESCRIBECH4= .FALSE. ,  
LUKCA_BUDGET2= .FALSE. ,  
LUKCA_QF11F12MBR= .FALSE. ,  
LUKCA_USEUMUIVALS= .FALSE. ,  
LUKCA_NAT_SEDI= .FALSE. ,  
LUKCA_HET_PSC= .FALSE. ,  
LUKCA_H2O_FEEDBACK= .FALSE. ,  
LUKCA_CLBRCONS= .FALSE. ,  
LUKCA_USERO3= .FALSE. ,  
LUKCA_USECO3= .FALSE. ,  
LUKCA_USERELAXO3= .FALSE. ,  
LUKCA_RADO3= .FALSE. ,  
LUKCA_RADCH4= .FALSE. ,  
LUKCA_RADN2O= .FALSE. ,  
LUKCA_RADF11= .FALSE. ,  
LUKCA_RADF12= .FALSE. ,
```



```

LUKCA_RADF113= .FALSE. ,
LUKCA_RADF22= .FALSE. ,
LUKCA_RADCH2O= .FALSE. ,
LUKCA_INTDD= .FALSE. ,
PHOT2D_DIR='PHOT2D_DIR is unset' ,
JVSPEC_DIR='JVSPEC_DIR is unset' ,
JVSPEC_FILE='JVSPEC_FILE is unset' ,
STRAT2D_DIR='STRAT2D_DIR is unset' ,
JPCTR=0,
JPSPEC=0,
JPBK=0,
JPTK=0,
JPPJ=0,
JPHK=0,
JPNR=0,
JPDD=0,
JPDW=0,
JPEQ=2,
/

```

```

&RUN_Nudging
/

```

```

&RUN_Dyn
L_PRIMITIVE=.TRUE. ,
L_DRY=.FALSE. ,
L_free_slip=.FALSE. ,
L_ADJUST_WET=.FALSE. ,
L_perturb_IC_theta=.FALSE. ,
L_PHYSICS=.TRUE. ,
IntRand_seed=0,
L_BACKWARDS=.FALSE. ,
L_INTERP_DEPART=.FALSE. ,
ALPHA_1= 0.70 ,
ALPHA_2= 1.00 ,
ALPHA_3= 0.70 ,
ALPHA_4= 1.00 ,
ALPHA_1_2=0.6 ,
ALPHA_2_2=1.0 ,
ALPHA_3_2=0.6 ,
ALPHA_4_2=1.0 ,
L_NEW_TDISC=.FALSE. ,
NUMCYCLES=1,
EXTRP_WEIGHT=1.50 ,
GCR_USE_TOL_ABS=.TRUE. ,
GCR_USE_RESIDUAL_TOL=.FALSE. ,
GCR_TOL_RES=0.0 ,
GCR_TOL_ABS=1.000e-02 ,
GCR_ZERO_INIT_GUESS=.TRUE. ,
L_GCR_CYCLE_OPT=.TRUE. ,
GCR_MAX_ITERATIONS=100 ,
GCR_DIAGNOSTICS=1,
GCR_ITS_AVG_STEP= 12,24,1440 ,
GCR_PRECON_OPTION=4,
GCR_ADI_ADD_FULL_SOLN=.TRUE. ,
L_GCR_FAST_X=.FALSE. ,
GCR_N_ADL_PSEUDO_TIMESTEPS=1,
GCR_ADL_PSEUDO_TIMESTEP=0.00080 ,
GCR_RESTART_VALUE=2,
G_term_tol=0.9 ,
L_mix_ratio=.TRUE. ,
L_QWATERLOAD=.TRUE. ,
L_fint_theta=.FALSE. ,

```

```

N_RIMS_TO_DO=1,
L_REGULAR=.TRUE. ,
L_LBC_BALANCE=.FALSE. ,
L_LBC_NEW=.FALSE. ,
L_RUN_WITH_PHYSICS2 = .TRUE. ,
L_thmono_fixed=.TRUE. ,
/

```

```

&RUN_SL
L_CONSERV=.FALSE. , .TRUE. , .FALSE. , .FALSE. ,
L_MOIST_NONHYDRO_CONSERVE=.TRUE. ,
L_MONO= .FALSE. , .TRUE. , .FALSE. , .FALSE. ,
L_HIGH= .TRUE. , .TRUE. , .TRUE. , .FALSE. ,
MONOTONE_SCHEME= 0 , 1 , 0 , 0 ,
HIGH_ORDER_SCHEME= 3 , 6 , 3 , 0 ,
DEPART_SCHEME=1,
DEPART_ORDER=2,
L_RITCHIE_MONO=.TRUE. ,
L_RITCHIE_HIGH=.FALSE. ,
RITCHIE_MONOTONE_SCHEME=1,
RITCHIE_HIGH_ORDER_SCHEME=0,
INTERP_VERTICAL_SEARCH_TOL=22,
L_2D_SL_GEOMETRY=.FALSE. ,
L_SL_HALO_REPROD=.FALSE. ,
THMONO_HEIGHT=5.00000 e+02,
L_CONSERVE_TRACERS=.TRUE. ,
/

```

```

&RUN_Diffusion
L_DIFF_CTL=.TRUE. ,
L_DIFFUSION=.FALSE. ,
L_CDIFUSION= .FALSE. ,
HORIZONTAL_LEVEL=51,
L_subfilter_horiz=.FALSE. ,
L_subfilter_vert=.FALSE. ,
L_subfilter_blend=.FALSE. ,
TOP_FILT_START= 1000,
TOP_FILT_END= 1000,
TOP_DIFF= 0.10 ,
L_UPPER_RAMP=.FALSE. ,
L_VERTICAL_DIFFUSION=.FALSE. ,
L_RAMP=.FALSE. ,
L_ADJUST_THETA=.TRUE. ,
ADJUST_THETA_START= 51,
ADJUST_THETA_END= 85,
L_VDIFF_UV= .FALSE. ,
VDIFFUV_START= 1000,
VDIFFUV_END= 1000,
VDIFFUV_TIMESCALE= 1,
VDIFFUV_TEST= 100.0 ,
L_SPONGE= .FALSE. ,
SPONGE_EW= 0,
SPONGE_NS= 0,
SPONGE_POWER= 1,
L_DIVDAMP= .FALSE. ,
DIV_DAMP_COEFFICIENT=-1.0,
L_QPOS=.TRUE. ,
Q_POS_METHOD=4,
QLIMIT=1.000e-08,

```

```

L_QPOS_DIAG_PR=.FALSE. ,
Q_POS_TRACER_METHOD=4,
L_TARDIFF_Q=.TRUE. ,
TARDIFFQ_FACTOR= 0.10 ,
W_CONV_LIMIT= 0.3 ,
TARDIFFQ_TEST=5,
TARDIFFQ_START=1,
TARDIFFQ_END=53,
TAR_HORIZONTAL=51,
L_DIAG_PRINT=.TRUE. ,
L_DIAG_PRINT_OPS= .FALSE. ,
L_flush6= .TRUE. ,
L_PRINT_PE= .FALSE. ,
PRINT_STEP=1,
DIAG_INTERVAL= 1,
L_PRINT_W=.TRUE. ,
W_PRINT_LIMIT= 0.4 ,
L_PRINT_WMAX= .TRUE. ,
L_PRINT_DIV= .FALSE. ,
L_PRINT_LAPSE= .FALSE. ,
L_PRINT_THETA1= .TRUE. ,
L_PRINT_MAX_WIND= .FALSE. ,
L_DIAG_WIND= .FALSE. ,
L_PRINT_SHEAR= .FALSE. ,
L_DIAG_NOISE= .FALSE. ,
L_DIAG_L2NORMS= .FALSE. ,
L_DIAG_L2HELM= .FALSE. ,
NORMLEV_START= 1,
NORMLEV_END= 85,
L_POLAR_FILTER= .FALSE. ,
L_POLAR_FILTER_INCS= .FALSE. ,
POLAR_FILTER_LAT_LIMIT= 0.0 ,
POLAR_FILTER_NORTH_LAT_LIMIT= 0.0 ,
POLAR_FILTER_SOUTH_LAT_LIMIT= 0.0 ,
POLAR_FILTER_N_SWEEPS= 0,
POLAR_FILTER_COEFFICIENT= 0.0 ,
POLAR_FILTER_STEP_PER_SWEEP= 0,
L_POFIL_NEW= .TRUE. ,
L_DIFF_AUTO= .TRUE. ,
L_PFTHETA=.TRUE. ,
L_PFUUV=.TRUE. ,
L_PFW=.TRUE. ,
L_PFINCS=.TRUE. ,
L_DIFF_THERMO=.FALSE. ,
L_DIFF_WIND=.FALSE. ,
L_DIFF_W=.TRUE. ,
L_DIFF_INCS=.FALSE. ,
DIFF_ORDER_THERMO=1,
DIFF_TIMESCALE_THERMO=0,
DIFF_ORDER_WIND=0,
DIFF_TIMESCALE_WIND=0,
DIFF_COEFF_REF= 0.000 ,
REF_LAT_DEG= 0.0 ,
SCALE_RATIO=2.000 ,
POLAR_CAP=85.000 ,
MAX_SWEEPS=8,
L_pfexner=.TRUE. ,
L_pofil_hadGEM2=.TRUE. ,
first_norm_print=1,
/

```

```

&RUN_RIVERS
RIVER_VEL=0.400000 ,

```

RIVER\_MCOEF=1.400000 ,  
/

&RADFCDIA  
/

&PPRINTXN  
LPRVXN=.FALSE. ,  
LPPRINT=.FALSE. ,  
LPRFLD=.FALSE. ,  
/

&ANCILCTA  
LSSTANOM=.FALSE. ,  
LAMIPHI=.TRUE. ,  
/

&UPANCA ANC\_REF\_NO=7, PERIOD=3, INTERVAL=30 /  
&UPANCA ANC\_REF\_NO=27, PERIOD=3, INTERVAL=1 /  
&UPANCA ANC\_REF\_NO=28, PERIOD=3, INTERVAL=1 /  
&UPANCA ANC\_REF\_NO=29, PERIOD=3, INTERVAL=1 /  
&UPANCA ANC\_REF\_NO=39, PERIOD=3, INTERVAL=5 /  
&UPANCA ANC\_REF\_NO=40, PERIOD=3, INTERVAL=5 /  
&UPANCA ANC\_REF\_NO=70, PERIOD=3, INTERVAL=5 /  
&UPANCA ANC\_REF\_NO=73, PERIOD=3, INTERVAL=5 /  
&UPANCA ANC\_REF\_NO=74, PERIOD=3, INTERVAL=5 /  
&UPANCA ANC\_REF\_NO=75, PERIOD=3, INTERVAL=5 /  
&UPANCA ANC\_REF\_NO=76, PERIOD=3, INTERVAL=5 /  
&UPANCA ANC\_REF\_NO=77, PERIOD=3, INTERVAL=5 /  
&UPANCA ANC\_REF\_NO=84, PERIOD=3, INTERVAL=5 /  
&UPANCA ANC\_REF\_NO=85, PERIOD=3, INTERVAL=5 /  
&UPANCA ANC\_REF\_NO=121, PERIOD=3, INTERVAL=5 /  
&UPANCA ANC\_REF\_NO=122, PERIOD=3, INTERVAL=5 /  
&UPANCA ANC\_REF\_NO=123, PERIOD=3, INTERVAL=5 /  
&UPANCA ANC\_REF\_NO=157, PERIOD=3, INTERVAL=5 /  
&UPANCA ANC\_REF\_NO=187, PERIOD=3, INTERVAL=5 /

&INTFCNSTA  
/

&R2SWNCAL  
N\_SWCall= 2 ,  
/

&R2SWCLNL  
SPECTRAL\_FILE\_SW='\$SPECTRAL/spec\_sw\_ga3\_0 ',  
FIRST\_BAND\_SW=1,  
LAST\_BAND\_SW=6,  
L2STREAM\_SW=16,  
LGAS\_OVERLAP\_SW=5,  
L\_LOCAL\_CNV\_PARTITION\_SW=.TRUE. ,  
L\_CLOUD\_REPRESENTATION\_SW=2,  
L\_CLOUD\_SW=10,  
L\_SOLVER\_SW=13,  
L\_O2\_SW=.TRUE. ,  
L\_ST\_WATER\_SW=5,  
L\_CNV\_WATER\_SW=5,  
L\_ST\_ICE\_SW=8,  
L\_CNV\_ICE\_SW=8,  
L\_CH4\_SW=.FALSE. ,  
L\_N2O\_SW=.FALSE. ,  
/

```

&R2SWCLNL
SPECTRAL_FILE_SW='$SPECTRAL/spec_sw_cloud3_0',
FIRST_BAND_SW=1,
LAST_BAND_SW=2,
L2STREAM_SW=16,
LGAS_OVERLAP_SW=5,
LLOCAL_CNV_PARTITION_SW=.TRUE.,
LCLOUD_REPRESENTATION_SW=2,
LCLOUD_SW=2,
LSOLVER_SW=16,
L_O2_SW=.FALSE.,
LST_WATER_SW=5,
LCNV_WATER_SW=5,
LST_ICE_SW=8,
LCNV_ICE_SW=8,
L_CH4_SW=.FALSE.,
L_N2O_SW=.FALSE.,
/
&R2LWNCAL
N_LWCALL= 2,
/

```

```

&R2LWCLNL
SPECTRAL_FILE_LW='$SPECTRAL/spec_lw_ga3_0',
FIRST_BAND_LW=1,
LAST_BAND_LW=9,
L2STREAM_LW=12,
LGAS_OVERLAP_LW=5,
LLOCAL_CNV_PARTITION_LW=.TRUE.,
LCLOUD_REPRESENTATION_LW=2,
L_IR_SOURCE_QUAD_LW=.TRUE.,
LCLOUD_LW=10,
LSOLVER_LW=13,
LSCATTER_METHOD_LW=1,
L_N2O_LW=.TRUE.,
L_CH4_LW=.TRUE.,
L_CFC11_LW=.TRUE.,
L_CFC12_LW=.TRUE.,
L_HCFC22_LW=.FALSE.,
L_CFC113_LW=.FALSE.,
L_CFC114_LW=.FALSE.,
L_HFC125_LW=.FALSE.,
L_HFC134A_LW=.FALSE.,
LST_WATER_LW=5,
LCNV_WATER_LW=5,
LST_ICE_LW=8,
LCNV_ICE_LW=8,
LMICROPHYSICS_LW=.TRUE.,
LSOLAR_TAIL_FLUX=.FALSE.,
/

```

```

&R2LWCLNL
SPECTRAL_FILE_LW='$SPECTRAL/spec_lw_cloud3_0',
FIRST_BAND_LW=1,
LAST_BAND_LW=1,
L2STREAM_LW=12,
LGAS_OVERLAP_LW=5,
LLOCAL_CNV_PARTITION_LW=.TRUE.,
LCLOUD_REPRESENTATION_LW=2,
L_IR_SOURCE_QUAD_LW=.TRUE.,
LCLOUD_LW=2,
LSOLVER_LW=16,
LSCATTER_METHOD_LW=1,

```

```

L_N2O_LW=.FALSE. ,
L_CH4_LW=.FALSE. ,
L_CFC11_LW=.FALSE. ,
L_CFC12_LW=.FALSE. ,
L_HCFC22_LW=.FALSE. ,
L_CFC113_LW=.FALSE. ,
L_CFC114_LW=.FALSE. ,
L_HFC125_LW=.FALSE. ,
L_HFC134A_LW=.FALSE. ,
LST_WATER_LW=5,
LCNV_WATER_LW=5,
LST_ICE_LW=8,
LCNV_ICE_LW=8,
L_MICROPHYSICS_LW=.FALSE. ,
L_SOLAR_TAIL_FLUX=.FALSE. ,
/
&CLMCHFCG
L_CLMCHFCG=.FALSE. ,
/

```

!!! BEGIN JULES NAMELISTS !!!

```

!!! Only variables where no default is provided in the corresponding !!!
!!! module are defined here                                     !!!

```

&JULES\_SWITCHES

```

!!! OTHERS LEFT AS DEFAULTS !!!
COR_MO_ITER=3,
L_MODISCOPT=0,
L_AGGREGATE=.FALSE. ,
BUDDY_SEA=1,
FRAC_SNOW_SUBL_MELT=1,
CAN_MODEL=4,
L_EPOT_CORR=.TRUE. ,
CAN_RAD_MOD=4,
ALL_TILES=0,
L_FLAKE_MODEL=.FALSE. ,
ISeaZ0T=1,
L_VG_SOIL=.TRUE. ,
SOILHC_METHOD=2,
L_SNOWDEP_SURF=.TRUE. ,
ISCRNTDIAG=2,
/

```

&JULES\_NSTYPES

```

NPFT=5,
NNVG=4,
URBAN=6,
LAKE=7,
SOIL=8,
ICE=9,
/

```

&JULES\_NVEGPARM

```

ALBSNC_NVG_IO = 4.00000e-01, 8.00000e-01, 8.00000e-01, 8.00000e-01,
ALBSNF_NVG_IO = 1.80000e-01, 6.00000e-02, -1.00000e+00, 7.50000e-01,
CATCH_NVG_IO = 5.00000e-01, 0.00000e+00, 0.00000e+00, 0.00000e+00,
GS_NVG_IO = 0.00000e+00, 0.00000e+00, 1.00000e-02, 1.00000e+06,
INFIL_NVG_IO = 1.00000e-01, 0.00000e+00, 5.00000e-01, 0.00000e+00,
Z0_NVG_IO = 1.00000e+00, 1.00000e-04, 1.00000e-03, 5.00000e-04,
CH_NVG_IO = 2.80000e+05, 2.11000e+07, 0.00000e+00, 0.00000e+00,
VF_NVG_IO = 1.00000e+00, 1.00000e+00, 0.00000e+00, 0.00000e+00,
EMIS_NVG_IO = 9.70000e-01, 9.85000e-01, 9.00000e-01, 9.90000e-01,

```

ZOHM\_NVG\_IO = 1.00000e-07, 2.50000e-01, 2.00000e-02, 2.00000e-01,  
/

&JULES\_PFTPARAM

C3\_IO = 1, 1, 1, 0, 1,  
ORIENT\_IO = 0, 0, 0, 0, 0,  
A\_WL\_IO = 0.65, 0.65, 0.005, 0.005, 0.10,  
A\_WS\_IO = 10.00, 10.00, 1.00, 1.00, 10.00,  
ALBSNC\_MAX\_IO = 2.50000e-01, 2.50000e-01, 6.00000e-01, 6.00000e-01, 4.00000e-01,  
ALBSNC\_MIN\_IO = 3.00000e-01, 3.00000e-01, 8.00000e-01, 8.00000e-01, 8.00000e-01,  
ALBSNF\_MAX\_IO = 1.43000e-01, 8.80000e-02, 1.92000e-01, 1.59000e-01, 1.15000e-01,  
DZ0V\_DH\_IO = 5.00000e-02, 5.00000e-02, 1.00000e-01, 1.00000e-01, 1.00000e-01,  
CATCH0\_IO = 5.00000e-01, 5.00000e-01, 5.00000e-01, 5.00000e-01, 5.00000e-01,  
DCATCH\_DLAL\_IO = 5.00000e-02, 5.00000e-02, 5.00000e-02, 5.00000e-02, 5.00000e-02,  
INFIL\_F\_IO = 4.00000e+00, 4.00000e+00, 2.00000e+00, 2.00000e+00, 2.00000e+00,  
KEXT\_IO = 5.00000e-01, 5.00000e-01, 5.00000e-01, 5.00000e-01, 5.00000e-01,  
ROOTD\_FT\_IO = 3.00000e+00, 1.00000e+00, 5.00000e-01, 5.00000e-01, 5.00000e-01,  
ZOHM\_PFT\_IO = 1.65000e+00, 1.65000e+00, 1.00000e-01, 1.00000e-01, 1.00000e-01,  
ALPHA\_IO = 0.08, 0.08, 0.08, 0.040, 0.08,  
ALNIR\_IO = 0.45, 0.35, 0.58, 0.58, 0.58,  
ALPAR\_IO = 0.10, 0.07, 0.10, 0.10, 0.10,  
B\_WL\_IO = 1.667, 1.667, 1.667, 1.667, 1.667,  
DGL\_DM\_IO = 0.0, 0.0, 0.0, 0.0, 0.0,  
DGL\_DT\_IO = 9.0, 9.0, 0.0, 0.0, 9.0,  
DQCRIT\_IO = 0.090, 0.060, 0.100, 0.075, 0.100,  
ETA\_SL\_IO = 0.01, 0.01, 0.01, 0.01, 0.01,  
FD\_IO = 0.015, 0.015, 0.015, 0.025, 0.015,  
FSMC\_OF\_IO = 0.00, 0.00, 0.00, 0.00, 0.00,  
F0\_IO = 0.875, 0.875, 0.900, 0.800, 0.900,  
G\_LEAF\_0\_IO = 0.25, 0.25, 0.25, 0.25, 0.25,  
GLMIN\_IO = 1.0E-6, 1.0E-6, 1.0E-6, 1.0E-6, 1.0E-6,  
KPAR\_IO = 0.50, 0.50, 0.50, 0.50, 0.50,  
NEFF\_IO = 0.8e-3, 0.8e-3, 0.8e-3, 0.4e-3, 0.8e-3,  
NL0\_IO = 0.040, 0.030, 0.060, 0.030, 0.030,  
NR\_NL\_IO = 1.00, 1.00, 1.00, 1.00, 1.00,  
NS\_NL\_IO = 0.10, 0.10, 1.00, 1.00, 0.10,  
OMEGA\_IO = 0.15, 0.15, 0.15, 0.17, 0.15,  
OMNIR\_IO = 0.70, 0.45, 0.83, 0.83, 0.83,  
R\_GROW\_IO = 0.25, 0.25, 0.25, 0.25, 0.25,  
SIGL\_IO = 0.0375, 0.1000, 0.0250, 0.0500, 0.0500,  
TLEAF\_OF\_IO = 273.15, 243.15, 258.15, 258.15, 243.15,  
TLOW\_IO = 0.0, -5.0, 0.0, 13.0, 0.0,  
TUPP\_IO = 36.0, 31.0, 36.0, 45.0, 36.0,  
EMIS\_PFT\_IO = 0.98, 0.99, 0.98, 0.98, 0.98,  
DUST\_VEG\_SCJ\_IO = 0.0, 0.0, 1.0, 1.0, 0.5,  
/

&JULES\_TRIFFID

CROP\_IO = 0, 0, 1, 1, 0,  
G\_AREA\_IO = 0.005, 0.004, 0.25, 0.25, 0.05,  
G\_GROW\_IO = 20.00, 20.00, 20.00, 20.00, 20.00,  
G\_ROOT\_IO = 0.25, 0.25, 0.25, 0.25, 0.25,  
G\_WOOD\_IO = 0.01, 0.01, 0.20, 0.20, 0.05,  
LAI\_MAX\_IO = 9.00, 9.00, 4.00, 4.00, 4.00,  
LAI\_MIN\_IO = 3.00, 3.00, 1.00, 1.00, 1.00,  
/

&JULES\_SNOWPARAM

!!! USE DEFAULTS FOR SCALARS !!!  
DZSNOW\_IO = 0.1, 0.2, 0.2, ! Note that this will only be copied to  
! the actual dzsnow if nsmax > 0 above  
canSnowPft = .FALSE., .TRUE., .FALSE., .FALSE., .FALSE.,  
/

```

&JULES_SOIL_PARAM
  !!! USE DEFAULTS FOR SCALARS !!!
  DZSOIL_IO = 0.1000, 0.2500, 0.6500, 2.0000,
  /

&JULES_SURF_PARAM
  emis_sea=0.985,
  emis_sice=0.976,
  !!! USE DEFAULTS FOR MOST VARIABLES !!!
  z0miz=5.00000e-04,
  z0sice=5.00000e-04,
  z0h_z0m_miz = 0.2,
  z0h_z0m_sice = 0.2,
  /

&JULES_ELEVATE
  !!! THIS IS ONLY USED IF LAGGREGATE IS FALSE !!!
  SURF_HGT_IO = 0.00, 0.00, 0.00, 0.00, 0.00, 0.00, 0.00, 0.00, 0.00,
  /

&JULES_RAD_PARAM
  !!! USE DEFAULTS FOR ALL !!!
  /

&JULES_CS_MIN
  !!! USE DEFAULT !!!
  /

&JULES_SEED
  !!! USE DEFAULTS FOR ALL !!!
  /

&JULES_SIGM
  !!! USE DEFAULT !!!
  /

&URBAN_SWITCHES
  l_moruses_albedo      = .FALSE.,
  l_moruses_emissivity  = .FALSE.,
  l_moruses_rough       = .FALSE.,
  l_moruses_storage     = .FALSE.,
  l_moruses_storage_thin = .FALSE.,
  l_moruses_macdonald   = .FALSE.,
  l_urban_empirical     = .FALSE.,
  /

&URBAN2T_PARAM
  !!! Not required for URBAN-1T Scheme !!!
  /

!!! END JULES NAMELISTS !!!

!!! END OF FILE !!!

```









```

L_SOOT_CLD=.TRUE. ,
CALL_CHEMFREQ=1,
L_SO2_SURFEM=.TRUE. ,
L_SO2_HILEM=.TRUE. ,
L_SO2_NATEM=.TRUE. ,
L_SULPC_DMS=.TRUE. ,
L_DMS_EM=.TRUE. ,
L_DMS_EM_INTER=.TRUE. ,
L_DMS_OINTER=.FALSE. ,
L_DMS_Liss_Merlivat=.FALSE. ,
L_DMS_Wanninkhof=.TRUE. ,
L_DMS_Nightingale=.FALSE. ,
L_SULPC_OZONE=.TRUE. ,
L_SULPC_ONLINE_OXIDANTS=.FALSE. ,
L_SULPC_2_WAY_COUPLING=.FALSE. ,
L_SULPC_NH3=.TRUE. ,
L_USE_SULPC_DIRECT=.TRUE. ,
L_NH3_EM=.FALSE. ,
L_SULPC_SO2_O3_NONBUFFERED=.TRUE. ,
L_USE_SULPC_INDIRECT_SW=.TRUE. ,
L_USE_SULPC_INDIRECT_LW=.TRUE. ,
L_USE_SULPHATE_AUTOCONV=.TRUE. ,
L_USE_SULPHATE_SULPC=.TRUE. ,
L_NITRATE=.FALSE. ,
L_NITR_ACC=.FALSE. ,
L_NITR DISS=.FALSE. ,
L_USE_NITRATE_DIRECT=.FALSE. ,
L_USE_NITRATE_INDIRECT=.FALSE. ,
L_USE_NITRATE_AUTOCONV=.FALSE. ,
L_USE_NITRATE_SULPC=.FALSE. ,
L_USE_SEASALT_INDIRECT=.TRUE. ,
L_USE_SEASALT_AUTOCONV=.TRUE. ,
L_USE_SEASALT_SULPC=.TRUE. ,
L_USE_SEASALT_DIRECT=.TRUE. ,
L_USE_SEASALT_PM=.FALSE. ,
L_SOOT_SUREM=.FALSE. ,
L_SOOT_HILEM=.TRUE. ,
L_USE_SOOT_DIRECT=.TRUE. ,
L_USE_SOOT_INDIRECT=.FALSE. ,
L_USE_SOOT_AUTOCONV=.FALSE. ,
L_USE_SOOT_SULPC=.FALSE. ,
L_BIOMASS=.TRUE. ,
L_BMASS_SUREM=.TRUE. ,
L_BMASS_HILEM=.TRUE. ,
L_USE_BMASS_DIRECT=.TRUE. ,
L_USE_BMASS_INDIRECT=.TRUE. ,
L_USE_BMASS_AUTOCONV=.TRUE. ,
L_USE_BMASS_SULPC=.TRUE. ,
L_BMASS_NEW=.TRUE. ,
L_BMASS_AGD=.TRUE. ,
L_BMASS_CLD=.TRUE. ,
L_USE_BIOGENIC=.TRUE. ,
L_USE_ARCLBIOM=.FALSE. ,
L_USE_ARCLBLCK=.FALSE. ,
L_USE_ARCLSSLT=.FALSE. ,
L_USE_ARCLSULP=.FALSE. ,
L_USE_ARCLDUST=.FALSE. ,
L_USE_ARCLOFF=.FALSE. ,
L_USE_ARCLDLTA=.FALSE. ,
L_OCOFF=.TRUE. ,
L_OCOFF_SUREM=.FALSE. ,
L_OCOFF_HILEM=.TRUE. ,
L_USE_OCOFF_DIRECT=.TRUE. ,

```

```

L_USE_OCFF_INDIRECT=.TRUE. ,
L_USE_OCFF_AUTOCONV=.TRUE. ,
L_USE_OCFF_SULPC=.TRUE. ,
L_OCFF_NEW=.TRUE. ,
L_OCFF_AGD=.TRUE. ,
L_OCFF_CLD=.TRUE. ,
L_DUST=.TRUE. ,
L_dust_diag=.FALSE. ,
L_USE_DUST=.TRUE. ,
L_DUST_DIV1=.TRUE. ,
L_DUST_DIV2=.TRUE. ,
L_DUST_DIV3=.TRUE. ,
L_DUST_DIV4=.TRUE. ,
L_DUST_DIV5=.TRUE. ,
L_DUST_DIV6=.TRUE. ,
L_CAM_DUST=.FALSE. ,
L_TWOBIN_DUST_CNTLATM=.FALSE. ,
L_DUST_DIV1_LBC_OUT=.FALSE. ,
L_DUST_DIV2_LBC_OUT=.FALSE. ,
L_DUST_DIV3_LBC_OUT=.FALSE. ,
L_DUST_DIV4_LBC_OUT=.FALSE. ,
L_DUST_DIV5_LBC_OUT=.FALSE. ,
L_DUST_DIV6_LBC_OUT=.FALSE. ,
L_SO2_LBC_OUT=.FALSE. ,
L_SO4_AITKEN_LBC_OUT=.FALSE. ,
L_SO4_ACCU_LBC_OUT=.FALSE. ,
L_SO4 DISS_LBC_OUT=.FALSE. ,
L_DMS_LBC_OUT=.FALSE. ,
L_NH3_LBC_OUT=.FALSE. ,
L_SOOT_NEW_LBC_OUT=.FALSE. ,
L_SOOT_AGD_LBC_OUT=.FALSE. ,
L_SOOT_CLD_LBC_OUT=.FALSE. ,
L_BMASS_NEW_LBC_OUT=.FALSE. ,
L_BMASS_AGD_LBC_OUT=.FALSE. ,
L_BMASS_CLD_LBC_OUT=.FALSE. ,
L_OCFF_NEW_LBC_OUT=.FALSE. ,
L_OCFF_AGD_LBC_OUT=.FALSE. ,
L_OCFF_CLD_LBC_OUT=.FALSE. ,
L_NITR_ACC_LBC_OUT=.FALSE. ,
L_NITR DISS_LBC_OUT=.FALSE. ,
L_DUST_DIV1_LBC=.FALSE. ,
L_DUST_DIV2_LBC=.FALSE. ,
L_DUST_DIV3_LBC=.FALSE. ,
L_DUST_DIV4_LBC=.FALSE. ,
L_DUST_DIV5_LBC=.FALSE. ,
L_DUST_DIV6_LBC=.FALSE. ,
L_SO2_LBC=.FALSE. ,
L_SO4_AITKEN_LBC=.FALSE. ,
L_SO4_ACCU_LBC=.FALSE. ,
L_SO4 DISS_LBC=.FALSE. ,
L_DMS_LBC=.FALSE. ,
L_NH3_LBC=.FALSE. ,
L_SOOT_NEW_LBC=.FALSE. ,
L_SOOT_AGD_LBC=.FALSE. ,
L_SOOT_CLD_LBC=.FALSE. ,
L_BMASS_NEW_LBC=.FALSE. ,
L_BMASS_AGD_LBC=.FALSE. ,
L_BMASS_CLD_LBC=.FALSE. ,
L_OCFF_NEW_LBC=.FALSE. ,
L_OCFF_AGD_LBC=.FALSE. ,
L_OCFF_CLD_LBC=.FALSE. ,
L_NITR_ACC_LBC=.FALSE. ,
L_NITR DISS_LBC=.FALSE. ,

```

```

HLSWBANDS= 6 ,
HLLWBANDS= 9 ,
L_CLD_AREA=.FALSE. ,
L_ACF_CUSACK=.FALSE. ,
L_ACF_BROOKS=.FALSE. ,
L_PC2=.TRUE. ,
L_PC2_RESET=.FALSE. ,
l_pc2_diag_sh=.FALSE. ,
NPMSL_HEIGHT=500.00 ,
L_PMSL_SOR=.FALSE. ,
LEMCCORR=.TRUE. ,
LMASS_CORR=.TRUE. ,
LQT_CORR=.FALSE. ,
LEMQ_PRINT=.TRUE. ,
A_ENERGYSTEPS=72 ,
L_RHCPT=.FALSE. ,
L_AUTO_DEBIAS=.FALSE. ,
L_3D_CCA=.TRUE. ,
L_PHASE_LIM=.TRUE. ,
L_CO2_INTERACTIVE=.FALSE. ,
L_CO2_EMITS= .FALSE. ,
L_Q10= .TRUE. ,
L_NEG_TSTAR=.FALSE. ,
L_VEG_FRACS=.TRUE. ,
L_TRIFFID=.FALSE. ,
L_PHENOL=.FALSE. ,
L_TRIF_EQ=.FALSE. ,
L_NRUN_MID_TRIF=.FALSE. ,
L_DISTURB=.FALSE. ,
CAN_MODEL=4 ,
PHENOL_PERIOD=0 ,
TRIFFID_PERIOD=0 ,
L_UM_JULES_IO=.TRUE. ,
L_FLAKE_MODEL_IO=.FALSE. ,
L_URBAN2T_IO=.FALSE. ,
L_CTILE=.TRUE. ,
A_ASSIM_MODE='AC' ,
problem_number=0 ,
L_USE_METHOX=.TRUE. ,
Z_TOP=85000.00 ,
L_GWD=.TRUE. ,
L_USE_USSP=.TRUE. ,
L_RIVERS=.TRUE. ,
L_INLAND=.TRUE. ,
RIVER_STEP=10800 ,
L_MCR_QCF2=.FALSE. ,
L_MCR_QRAIN=.TRUE. ,
L_MCR_QGRAUP=.FALSE. ,
L_MCR_QCF2_LBC=.FALSE. ,
L_MCR_QRAIN_LBC=.FALSE. ,
L_MCR_QGRAUP_LBC=.FALSE. ,
L_PC2_LBC=.FALSE. ,
L_MURK_LBC=.FALSE. ,
L_int_uvw_lbc=.FALSE. ,
L_TOP=.TRUE. ,
L_PDM=.FALSE. ,
L_USE_TPPS_OZONE= .FALSE. ,
L_OZONE_INT= 2 ,
L_RADIATION=.TRUE. ,
L_RAIN=.TRUE. ,
L_MR_PHYSICS1=.TRUE. ,
L_BL=.TRUE. ,
L_HYDROLOGY=.TRUE. ,

```

```
L_SOIL_SAT_DOWN=.TRUE. ,
l_anthrop_heat_src=.FALSE. ,
L_ICOUNT=.FALSE. ,
L_UKCA=.FALSE. ,
L_UKCA_RADAER=.FALSE. ,
L_NUDGING=.FALSE. ,
L_FORCING= .FALSE. ,
L_TIMESTEP= .TRUE. ,
L_RADIANCE=.FALSE. ,
L_INHOM_CLOUD=.FALSE. ,
L_USE_OROG_CORR= .FALSE. ,
L_USE_GRAD_CORR= .TRUE. ,
l_use_skyview= .FALSE. ,
l_orog_unfilt= .FALSE. ,
L_USE_AOD= .TRUE. ,
L_MOD_K_FLUX=.TRUE. ,
L_CCRad= .TRUE. ,
L_USE_CARIOLLE=.FALSE. ,
L_USE_OZONEINRAD=.FALSE. ,
L_STPHSEED_WRITE=.FALSE. ,
L_STPHSEED_READ=.FALSE. ,
L_OASIS=.FALSE. ,
L_COUPLE_MASTER=.FALSE. ,
L_CONV_HIST=.FALSE. ,
L_DeCplTScr_Prg=.TRUE. ,
L_CldBaseDD_prg=.TRUE. ,
l_conv_opt=3,
L_tke_closure = .FALSE. ,
/
###END OF FILE###
```

## 6 Namelist differences between GA4.0/GL4.0 and GA3.0/GL3.0

The namelist differences between GA3.0 and GA4.0 are tabulated in Table 4, whilst the differences between GL3.0 and GL4.0 are tabulated in Table 5. In addition to the namelist options, another important input setting is the section version used for each section of atmospheric code. These are currently defined through compiler preprocessor directives (e.g. #IFDEF). The differences in these section versions between GA3.0 and GA4.0 are tabulated in Table 6

| MetUM Namelist  | Variable name           | GA3.0 value | GA4.0 value |
|-----------------|-------------------------|-------------|-------------|
| &NLSTCATM       | L_MR_PHYSICS1           | .FALSE.     | .TRUE.      |
|                 | IDynDiag                | 2           | 4           |
|                 | zhloc_depth_fac         |             | 0.3         |
|                 | COR_MO_ITER             | 1           | 3           |
|                 | cbl_op                  | 0           | 2           |
|                 | Prandtl                 |             | 1           |
| &RUN_Precip     | X1R                     | 26.2        | 2.2000e-01  |
|                 | X2R                     | 1.57        | 2.2000      |
|                 | lsiter                  | 10          | 1           |
| &RUN_Cloud      | NITER_BS                | 1           | 10          |
|                 | dbstdtbs_turb_0         | -4.50e-05   | 1.50e-04    |
|                 | i_pc2_erosion_method    | 1           | 3           |
|                 | i_pc2_conv_coupling     | 1           | 3           |
| &RUN_Convection | pc2_falliceshear_method | 1           | 2           |
|                 | icvdiag                 | 7           | 1           |
|                 | tv1_sd_opt              | 1           | 2           |
|                 | l4a_kterm               | .TRUE.      | .FALSE.     |
|                 | CCW_FOR_PRECIP_OPT      | 2           | 4           |
|                 | qlmin                   | 2.0000e-04  | 3.0000e-04  |
|                 | MPARWTR                 | 1.0000e-03  | 1.5000e-03  |
|                 | CAPE_TIMESCALE          | 5400        | 3600        |
|                 | ADAPT                   | 5           | 7           |
|                 | R_DET                   | 0.7500      | 0.9         |
|                 | amdets_fac              | 1.50        | 3.00        |
|                 | ENT_FAC                 | 0.90        | 1.0         |
|                 | ent_opt_dp              |             | 3           |
|                 | ent_dp_power            |             | 2.00        |
| ent_fac_dp      |                         | 1.35        |             |
| &RUN_Dyn        | ent_opt_md              |             | 0           |
|                 | L_mix_ratio             | .FALSE.     | .TRUE.      |
| &RUN_Diffusion  | L_thmono_fixed          | .FALSE.     | .TRUE.      |
|                 | Q_POS_METHOD            | 2           | 4           |
|                 | Q_POS_TRACER_METHOD     | 2           | 4           |
|                 | TARDIFFQ_END            | 85          | 53          |
|                 | L_DIFF_W                | .FALSE.     | .TRUE.      |
| &NLST_MPP       | DIFF_ORDER_THERMO       | 0           | 1           |
|                 | global_sum_method       | 1           | 2           |

Table 4: Differences in MetUM namelists between GA3.0 and GA4.0.



| JULES Namelist    | Variable name   | GA3.0 value                                  | GA4.0 value                                   |
|-------------------|-----------------|----------------------------------------------|-----------------------------------------------|
| &JULES_SWITCHES   | COR_MO_ITER     | 1                                            | 3                                             |
|                   | L_SNOWDEP_SURF  | .FALSE.                                      | .TRUE.                                        |
| &JULES_NVEGPARM   | Z0_NVG_IO       | 1.0e+00,<br>3.0e-04,<br>3.0e-04,<br>5.0e-04, | 1.0e+00,<br>1.0e-04,<br>1.0e-03,<br>5.0e-04,  |
|                   | EMIS_NVG_IO     | 9.7e-01,<br>9.7e-01,<br>9.7e-01,<br>9.7e-01, | 9.7e-01,<br>9.85e-01,<br>9.0e-01,<br>9.9e-01, |
|                   | Z0HM_NVG_IO     | 1.0e-01,<br>1.0e-01,<br>1.0e-01,<br>1.0e-01, | 1.0e-07,<br>2.5e-01,<br>2.0e-02,<br>2.0e-01,  |
| &JULES_PFTPARM    | Z0HM_PFT_IO     | 0.1,<br>0.1,<br>0.1,<br>0.1,<br>0.1,         | 1.65,<br>1.65,<br>0.1,<br>0.1,<br>0.1,        |
|                   | EMIS_PFT_IO     | 0.97,<br>0.97,<br>0.97,<br>0.97,<br>0.97,    | 0.98,<br>0.99,<br>0.98,<br>0.98,<br>0.98,     |
|                   | DUST_VEG_SCJ_IO |                                              | 0.0,<br>0.0,<br>1.0,<br>1.0,<br>0.5,          |
| &JULES_SURF_PARAM | emis_sea        | 1.0                                          | 0.985                                         |
|                   | emis_sice       | 1.0                                          | 0.976                                         |
|                   | z0h_z0m_miz     | 1.0                                          | 0.2                                           |
|                   | z0h_z0m_sice    | 1.0                                          | 0.2                                           |

Table 5: Differences in JULES namelists between GL3.0 and GL4.0.

| UM Code Section              | GA3.0 version                  | GA4.0 version       |
|------------------------------|--------------------------------|---------------------|
| Section 5: Convection        | <4A>                           | <5A>                |
| Section 10: Dynamical Solver | System dependant: <2A> or <2B> | <2B> in all systems |

Table 6: Differences in MetUM code section versions GA3.0 and GA4.0.
